# Supplementary material
Source: PubMed Central journal article supplement (PMC5363754)
Supplement: Supplementary_Figure_1_814.pdf [file Supplementary_Figure_1_814.pdf]

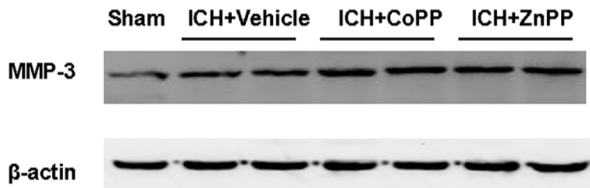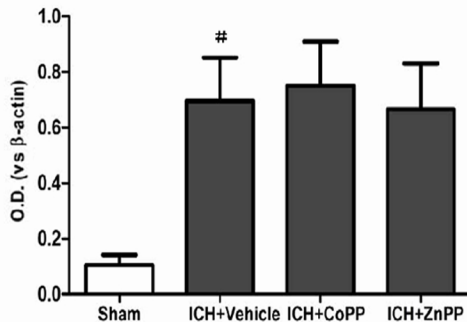

**Supplementary Figure 1.** Western blot analysis of matrix metalloproteinase 3 (MMP-3) expression on day 3 after collagenase-induced ICH. n=5 mice/group. Values are mean  $\pm$  SD. #p<0.01 vs. sham group.
