# Supplementary material
Source: PubMed Central journal article supplement (PMC5363754)
Supplement: Supplementary_Figure_2_814.pdf [file Supplementary_Figure_2_814.pdf]

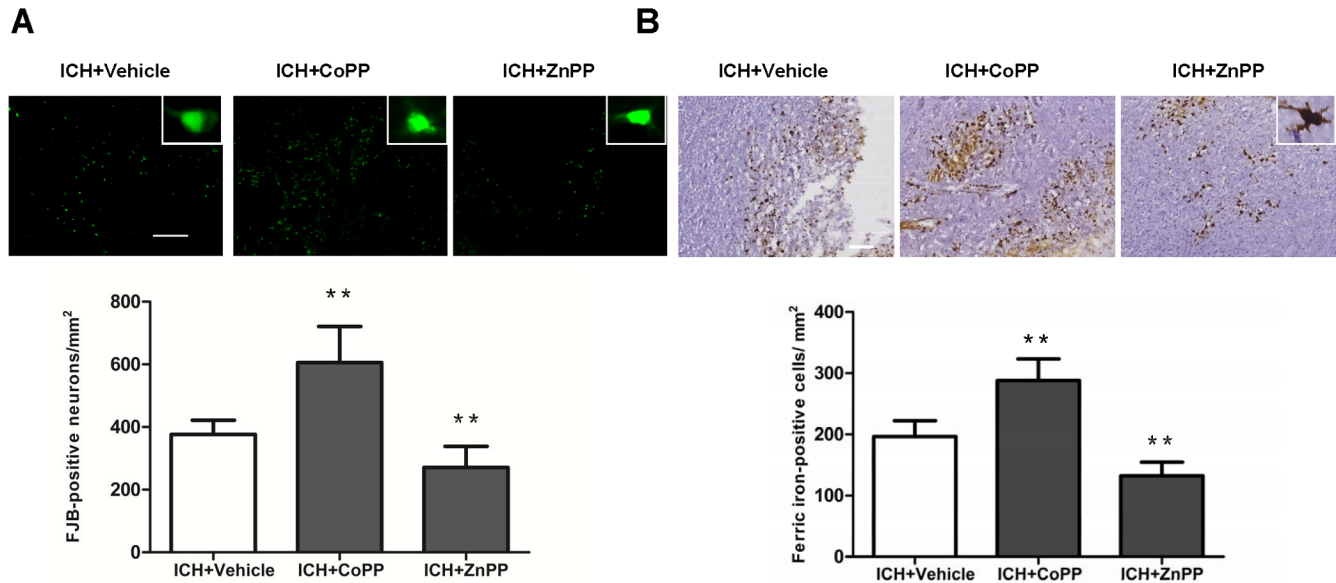

**Supplementary Figure 2.** Effect of HO-1 induction and inhibition on neuronal cell death and iron deposition. (A) Neuronal cell death was assessed with Fluoro Jade-B (FJB) on day 3 after collagenase-induced ICH. Scale bar = 100  $\mu$ m. (B) Iron deposition in the perihematomal region was assessed with Perls staining on day 3 after collagenase-induced ICH. Scale bar = 200  $\mu$ m. n=8 mice/group; \*\*p<0.01 vs. vehicle group. Values are means  $\pm$  SD.
