# Supplementary material
Source: PubMed Central journal article supplement (PMC5363754)
Supplement: Supplementary_Figure_3_814.pdf [file Supplementary_Figure_3_814.pdf]

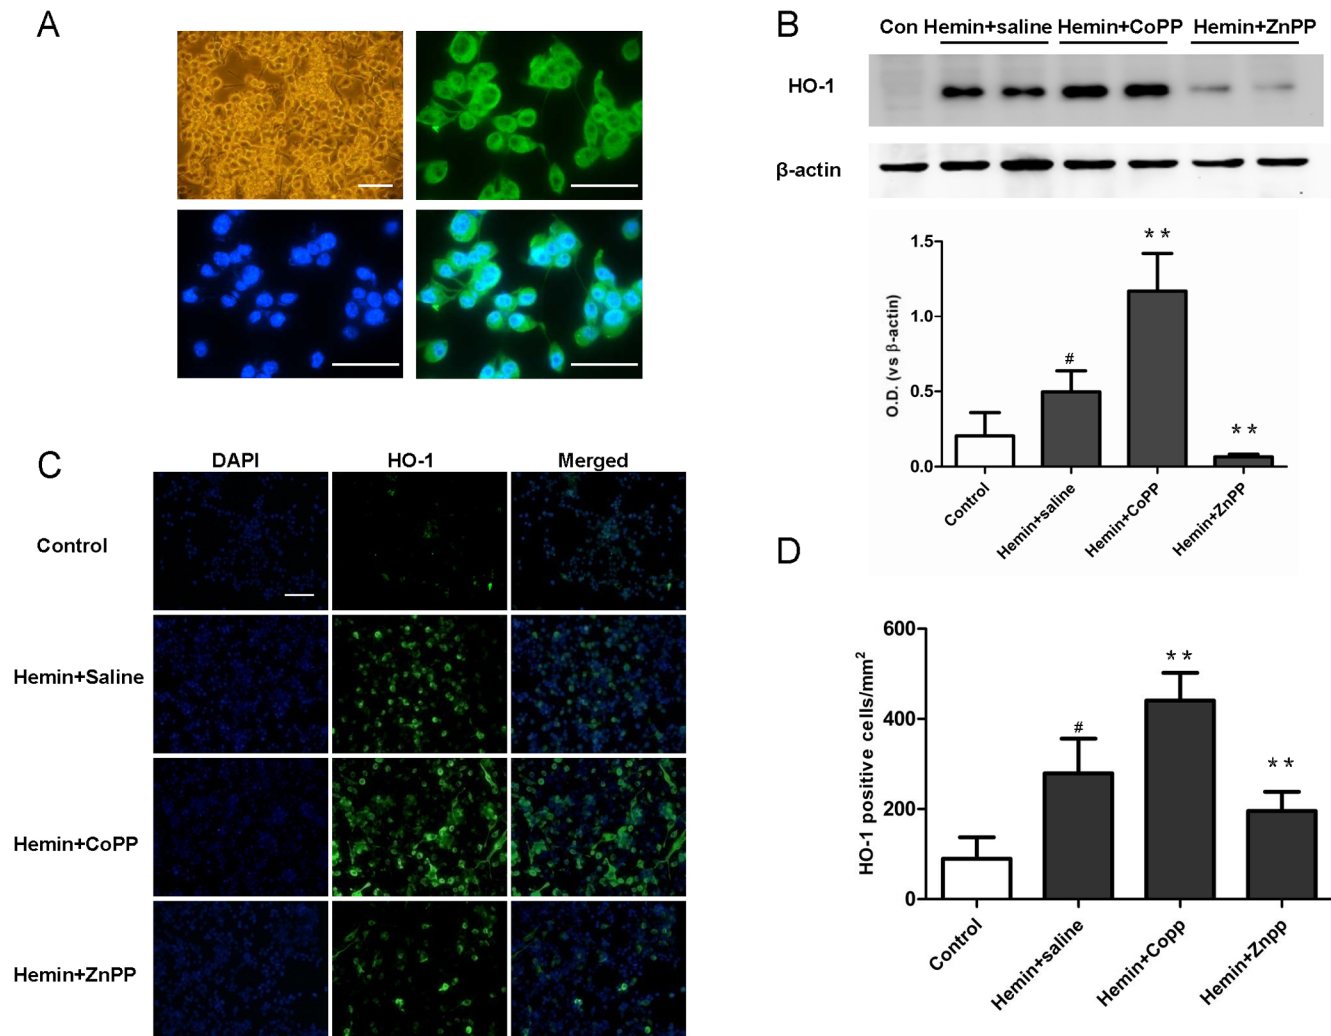

**Supplementary Figure 3.** Identification of BV2 microglial HO-1 expression. (A) Upper left: Cultured microglia cells were captured under a light microscope. Upper right: Microglia were identified by immunofluorescence staining with anti-Iba1 antibody (green). Lower left: Cell nuclei were labeled with DAPI. Lower right: Co-localization of Iba1 immunoreactivity with DAPI. Scale bars = 50  $\mu$ m. (B) Western blot analysis and bar graph show the expression of HO-1 in microglia after 24-h exposure to hemin+saline, hemin+CoPP, or hemin+ZnPP. # $p$ <0.01 vs. control group; \*\* $p$ <0.01 vs. hemin+saline group. Values are means  $\pm$  SD. (C, D) Immunofluorescence and bar graph show HO-1–positive microglia after 24-h exposure to hemin+saline, hemin+CoPP, or Hemin+ZnPP. Scale bar = 50  $\mu$ m. # $p$ <0.01 vs. control group; \*\* $p$ <0.01 vs. hemin+saline group. Values are means  $\pm$  SD.
